# Supplementary material for: Second-Generation Jak2 Inhibitors for Advanced Prostate Cancer: Are We Ready for Clinical Development?
Source: MDPI journal article supplement (doi:10.3390/cancers13205204), 2021-10-17
Supplement: s1 [file s1]

**Supplementary Table S1.** Chemical structures of JAK Family Inhibitors in Clinical Development.

| Drug Name   | Chemical structure                                                                   |
|-------------|--------------------------------------------------------------------------------------|
| Ruxolitinib | 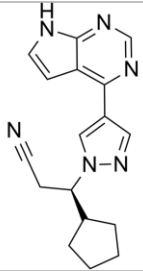    |
| Fedratinib  |    |
| Pacritinib  |   |
| Baricitinib |  |
| Momelotinib |  |

|              |                                                                                      |
|--------------|--------------------------------------------------------------------------------------|
| Gandotinib   | 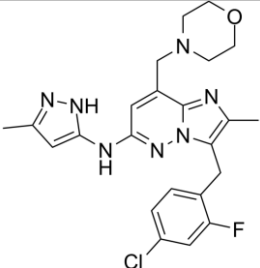    |
| Peficitinib  |    |
| Lestaurtinib |    |
| Tofacitinib  |   |
| WP 1066      |  |
| Atiprimod    |  |

|                    |                                                                                     |
|--------------------|-------------------------------------------------------------------------------------|
| Ilginatib (NS-018) | 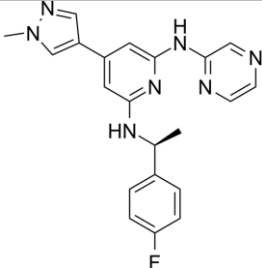   |
| AC430              |   |
| LS104              |   |
| AT9283             |  |
| Cerdulatinib       |  |
| Filgotinib         |  |
| Decernotinib       |  |

|               |                                                                                    |
|---------------|------------------------------------------------------------------------------------|
| Erlotinib     | 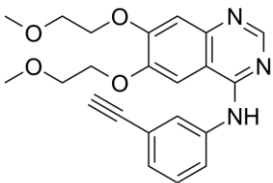  |
| Givinostat    |  |
| Repotrectinib |  |
| Zotiraciclib  |  |
